# Supplementary material for: Surface ligands enhance the catalytic activity of supported Au nanoparticles for the aerobic α-oxidation of amines to amides
Source: Royal Society of Chemistry journal article supplement (doi:10.1039/d1cy02121d), 2022-01-01
Supplement: d1cy02121d1.pdf [file d1cy02121d1.pdf]

Supplementary Information

## Surface ligands enhance the catalytic activity of supported Au nanoparticles for the aerobic $\alpha$ -oxidation of amines to amides

Puranjan Chatterjee, Hsin Wang, J. Sebastián Manzano, Uddhav Kanbur, Aaron D. Sadow and Igor I. Slowing\*

*U.S. Department of Energy, Ames Laboratory, Ames, Iowa 50011-3020, United States*

*Department of Chemistry, Iowa State University, Ames, Iowa 50011-3111, United States*

**Table S1.** Physicochemical properties of MSN supports.

| Support      | SA <sub>BET</sub> <sup>a</sup><br>(m <sup>2</sup> /g) | W <sub>BJH</sub> <sup>a</sup><br>(nm) | Group Loading <sup>b</sup><br>(mmol/g) |
|--------------|-------------------------------------------------------|---------------------------------------|----------------------------------------|
| MSN          | 1320                                                  | 2.6                                   | -                                      |
| MP-MSN       | 1015                                                  | 2.4                                   | 1.4                                    |
| PyEt-MSN     | 702                                                   | 2.1                                   | 0.94                                   |
| PyEt-MSN-0.7 | 795                                                   | 2.4                                   | 0.65                                   |
| PyEt-MSN-1.4 | 771                                                   | 2.1                                   | 1.4                                    |

<sup>a</sup> Measured by N<sub>2</sub> physisorption.

<sup>b</sup> Determined by CHNS elemental analysis.

Fig. S1 N<sub>2</sub> sorption isotherms of MSN supports.

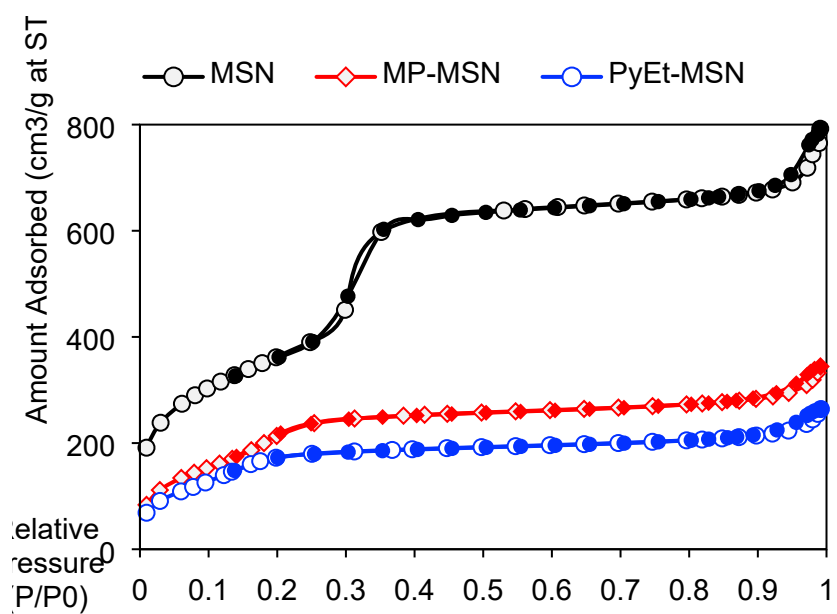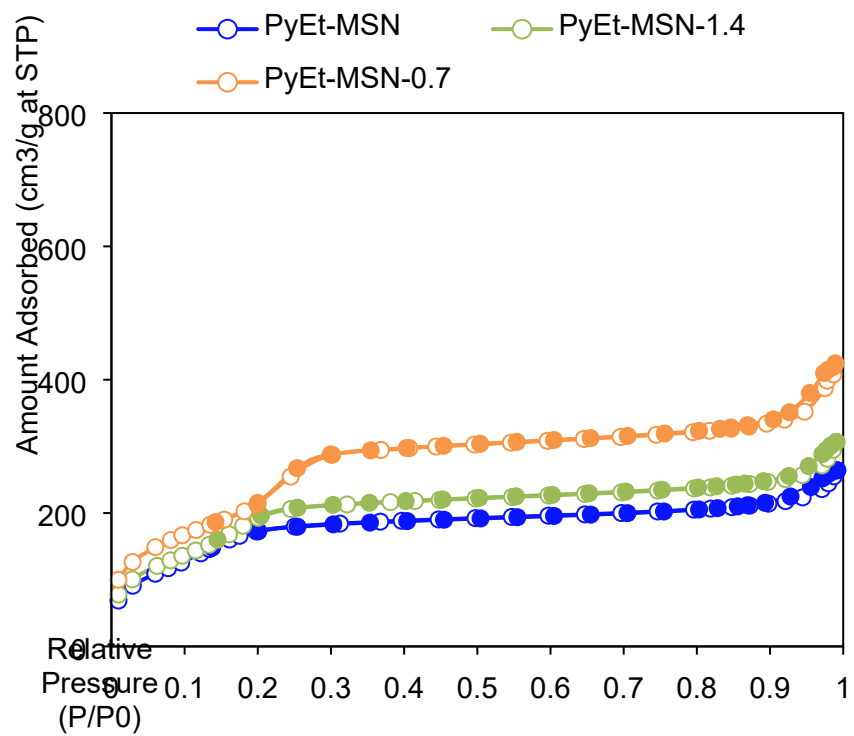

Fig. S2 Small angle XRD patterns of MSN supports.

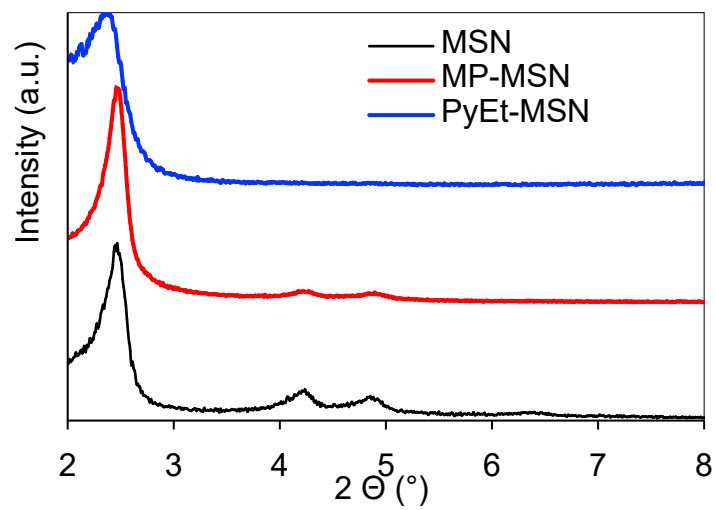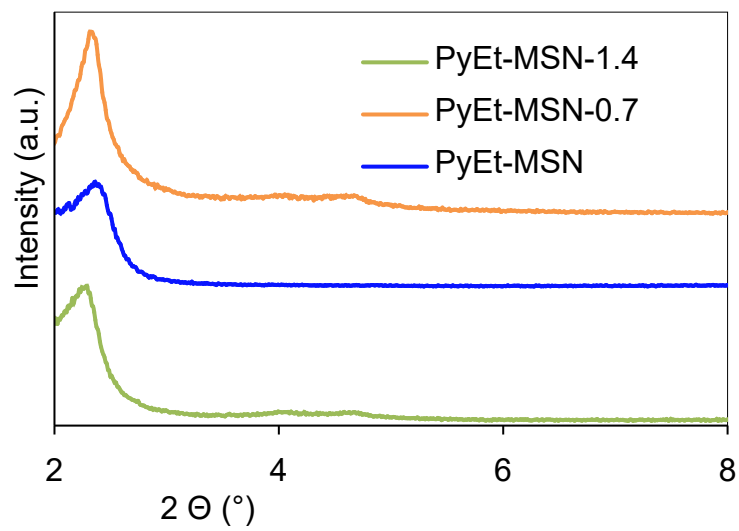

**Fig. S3** DRIFT spectra of MP-MSN showing bands in the a) 2900-2950  $\text{cm}^{-1}$  region assigned to C-H stretches and b) at 2582  $\text{cm}^{-1}$  assigned to S-H stretch. The parent MSN did not show any absorption in these regions.

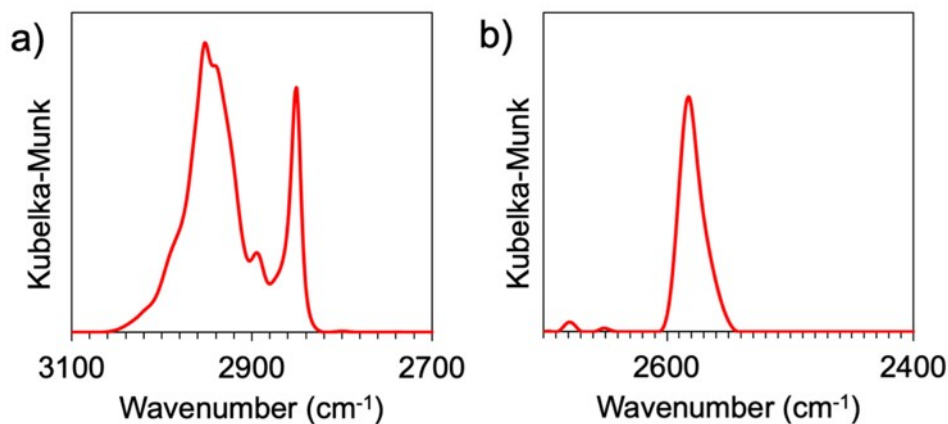

**Fig. S4** DRIFT spectra of PyEt-MSN (blue traces) showing signals in the a) 3000-3100  $\text{cm}^{-1}$  and 2800-3000  $\text{cm}^{-1}$  regions indicating presence of aromatic and aliphatic C-H vibrations respectively. b) The additional intense band at  $\sim 1612 \text{ cm}^{-1}$  is assigned to the C=N stretch of pyridine and the band at 1562  $\text{cm}^{-1}$  peak is attributed to protonated pyridine. The parent MSN (black trace) presented an absorption at 1618  $\text{cm}^{-1}$  assigned to physisorbed water.

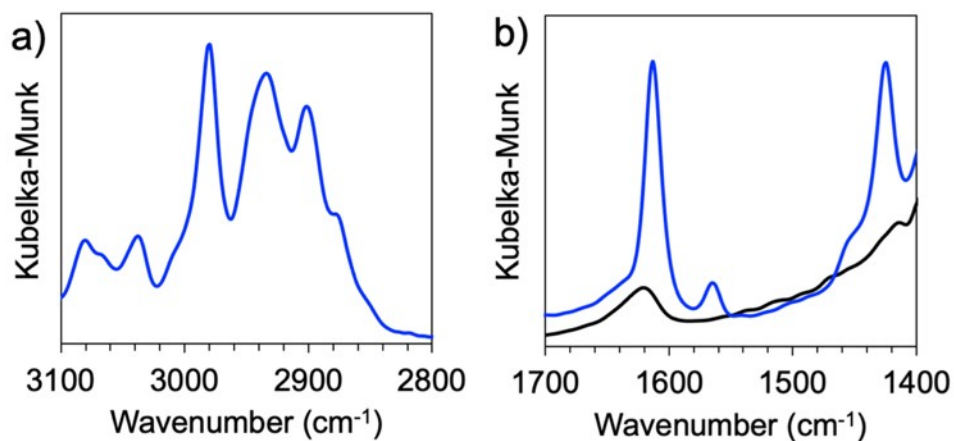

Fig. S5 N<sub>2</sub> sorption isotherms of the supported Au catalysts.

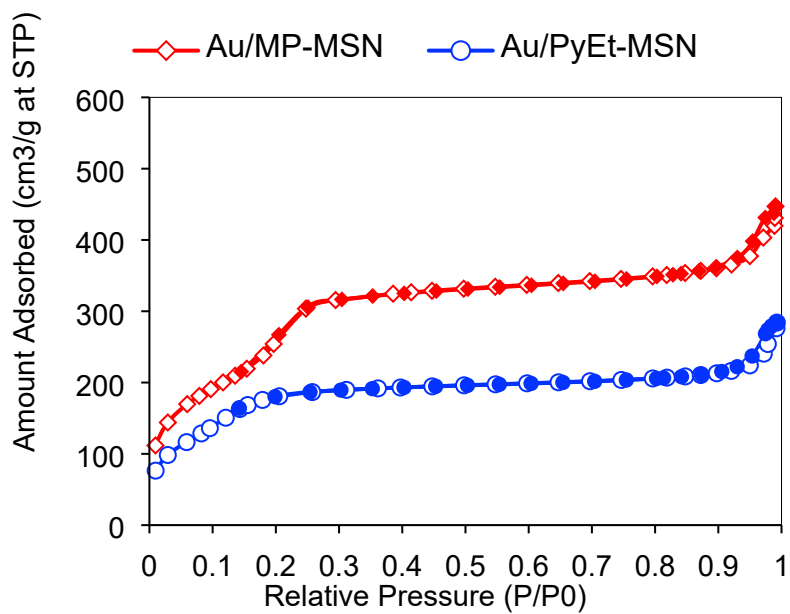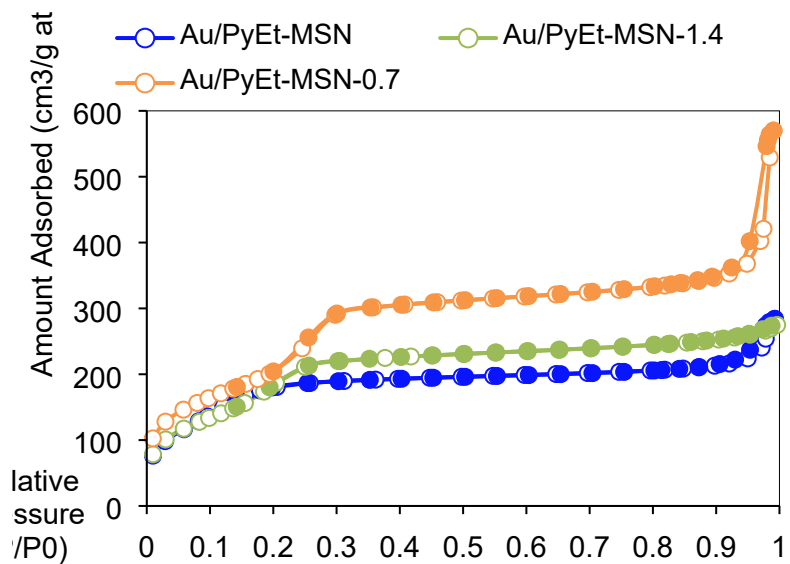

**Fig. S6** Small angle XRD patterns of supported Au catalysts.

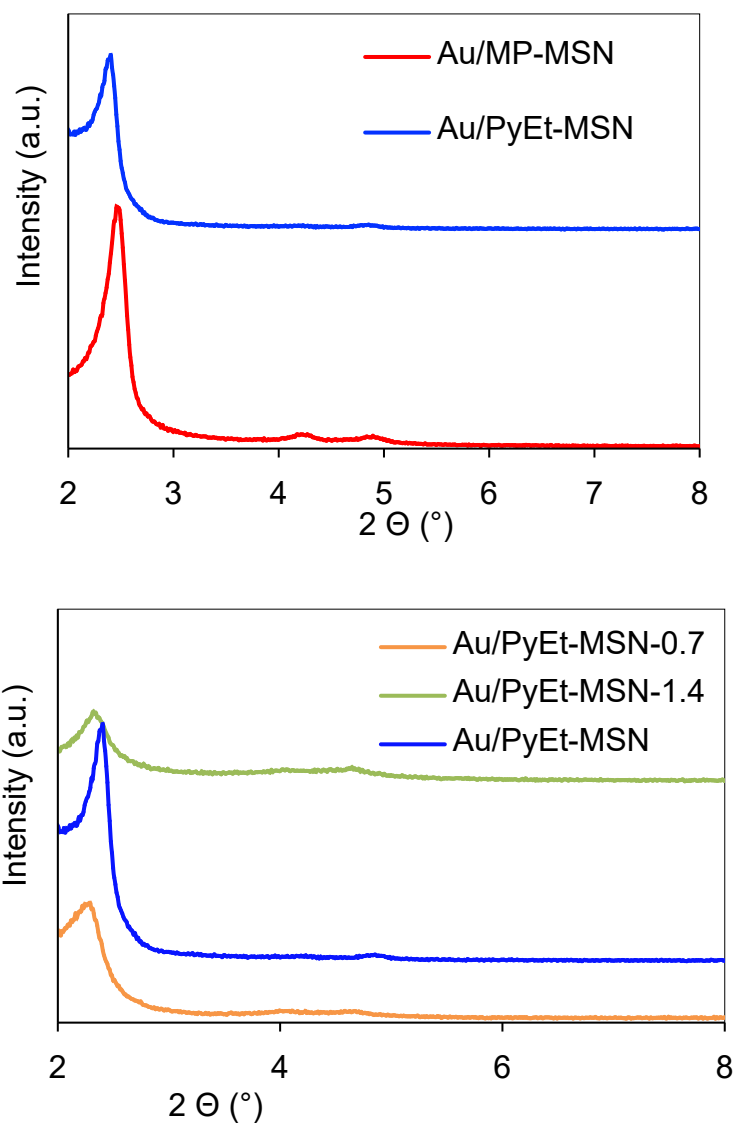

**Fig. S7** Sample  $^1\text{H}$  NMR spectra of reaction mixtures obtained from the Au/PyEt-MSN catalyzed oxidation of pyrrolidine (top) and N-methyl pyrrolidine (bottom).

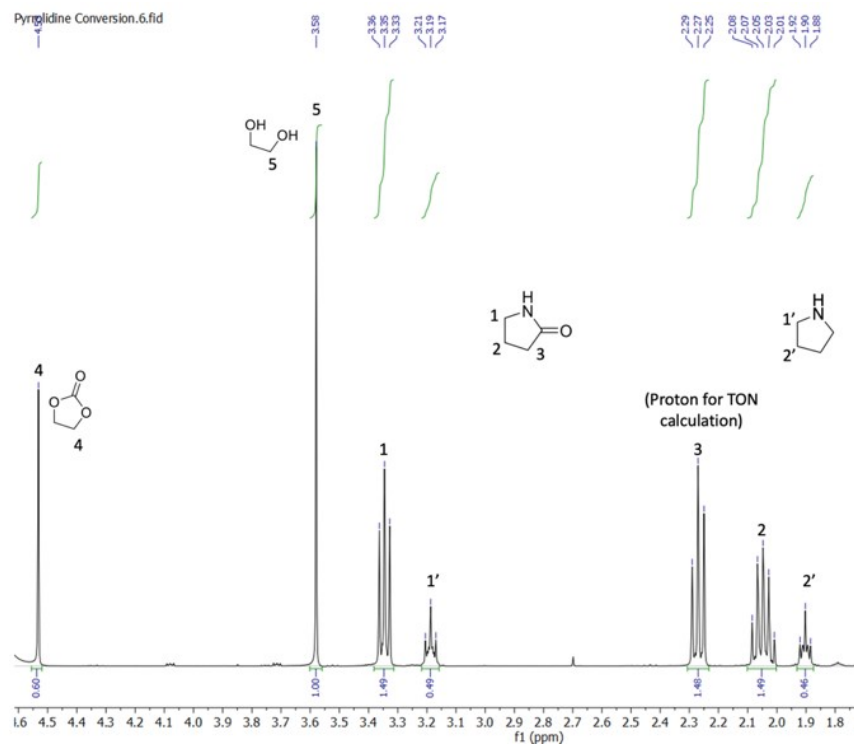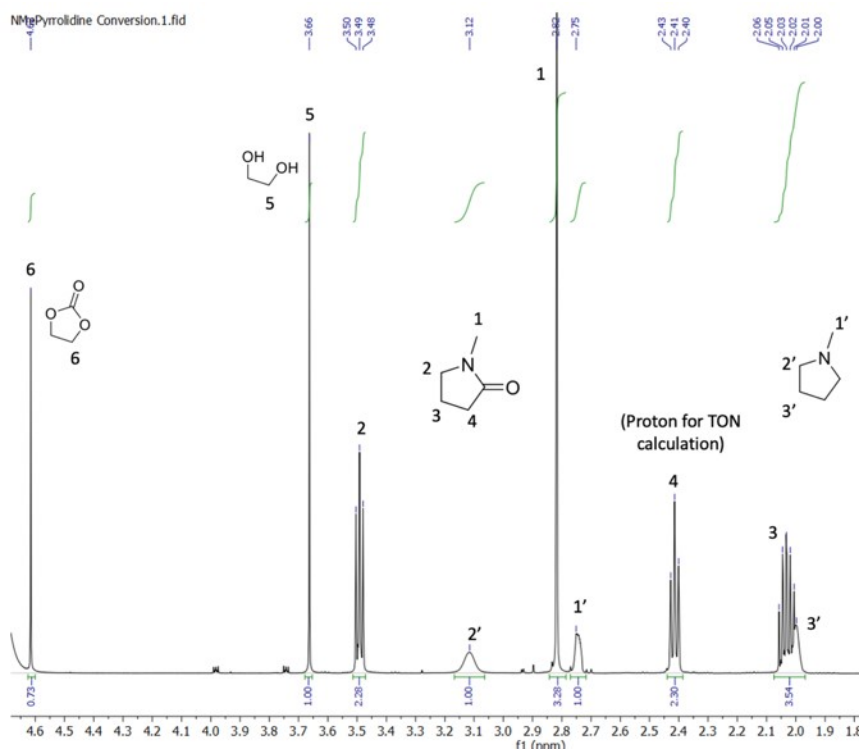

**Table S2.** Physicochemical properties of the catalysts.

| Catalyst                   | $SA_{\text{BET}}$<br>( $\text{m}^2/\text{g}$ ) <sup>a</sup> | $W_{\text{BJH}}$<br>(nm) <sup>a</sup> | Au Loading<br>(wt.%) <sup>b</sup> | % Dispersion <sup>c</sup> |
|----------------------------|-------------------------------------------------------------|---------------------------------------|-----------------------------------|---------------------------|
| Au/MP-MSN (0.5 wt %)       | 964                                                         | 2.3                                   | $0.46 \pm 0.02$                   | 52                        |
| Au/MP-MSN (4.8 wt %)       | 899                                                         | 2.4                                   | $4.8 \pm 0.1$                     | 47                        |
| Au/PyEt-MSN (0.5 wt %)     | 716                                                         | 2.0                                   | $0.50 \pm 0.07$                   | 44                        |
| Au/PyEt-MSN-0.7 (0.5 wt %) | 746                                                         | 2.3                                   | $0.50 \pm 0.02$                   | 43                        |
| Au/PyEt-MSN-1.4 (0.5 wt %) | 716                                                         | 2.4                                   | $0.49 \pm 0.04$                   | 30                        |
| Au/PyEt-MSN (3.9 wt %)     | 849                                                         | 2.3                                   | $3.9 \pm 0.2$                     | 15                        |

<sup>a</sup> Measured by  $\text{N}_2$  physisorption.

<sup>b</sup> Determined by ICP-OES analysis.

<sup>c</sup> Estimated by CO pulsed chemisorption.

**Fig. S8** Comparison of DRIFT spectra in the  $1450 - 1700 \text{ cm}^{-1}$  region of PyEt-MSN (blue), Au/PyEt-MSN (0.5 wt % Au) (yellow) and Au/PyEt-MSN (3.9 wt % Au) (brown). New bands are indicative of pyridyl-Au interaction.

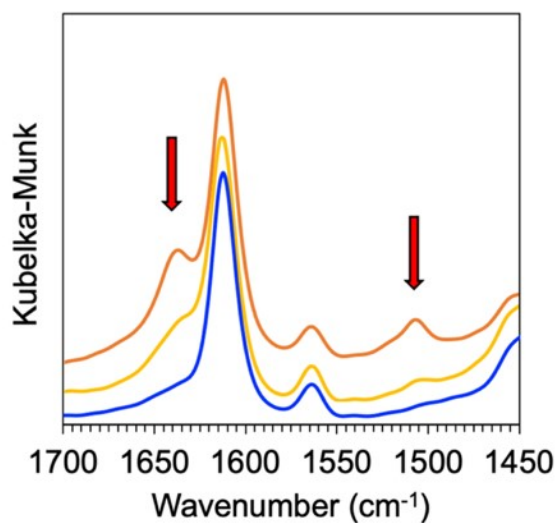





**Fig. S10** Particle aggregation upon exposure of Au/MSN to the electron beam in the TEM. Scale bar is 10 nm in all images except for the bottom left (50 nm).

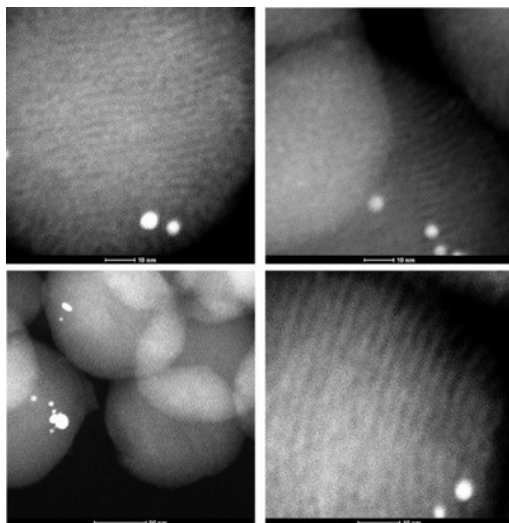

**Fig. S11** Representative STEM images of fresh (left) and spent (right) Au/MP-MSN (top) and Au/PyEt-MSN (bottom). Scale bar 20 nm in all images. Due to the small particle size of Au/MP-MSN it was not possible to reliably determine size distribution, however no large Au aggregates were observed upon inspection of the full field. Particle size distribution histograms of Au/PyEt-MSN are below their images. Average particle sizes were  $2.1 \pm 0.6$  nm for the fresh and  $2.3 \pm 0.6$  nm for the spent catalyst, based on 100 counts.

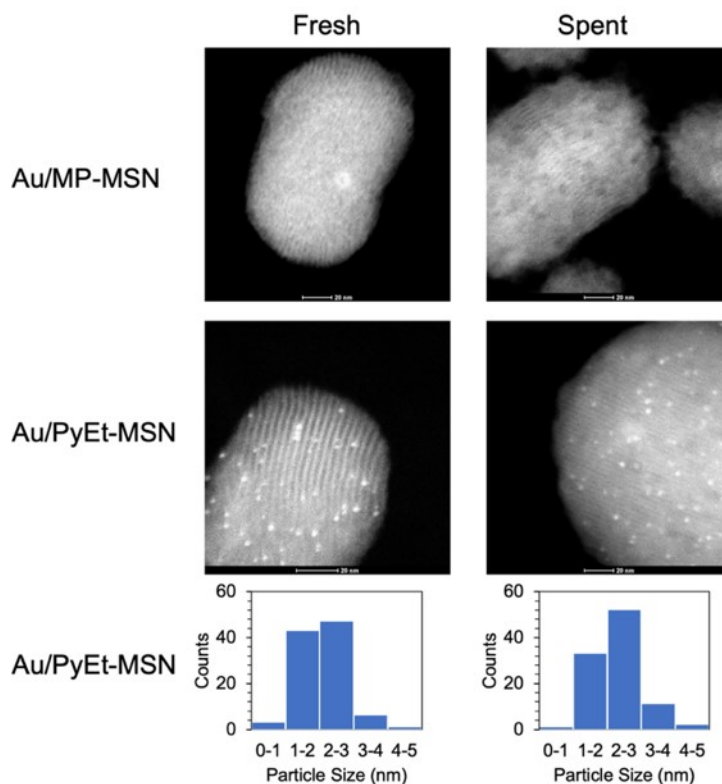

**Fig. S12** Representative STEM images and Au particle size histogram (based on 100 particle counts) of Au/MP-MSN with a 4.8 wt % metal loading.

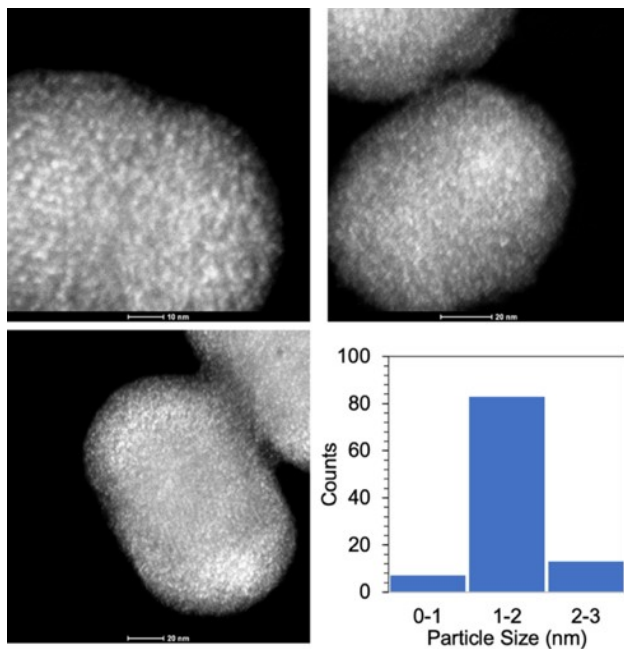

**Fig. S13** Comparison between the activities of Au/MP-MSN with different particle sizes. The different particle sizes were obtained using different Au wt %. 0.5 wt % of Au gave particles smaller than 1 nm, and 4.8 wt % of Au gave particles averaging 1.6 nm.

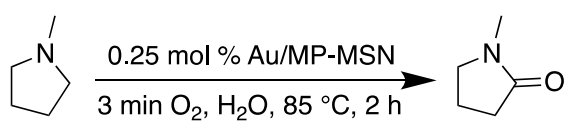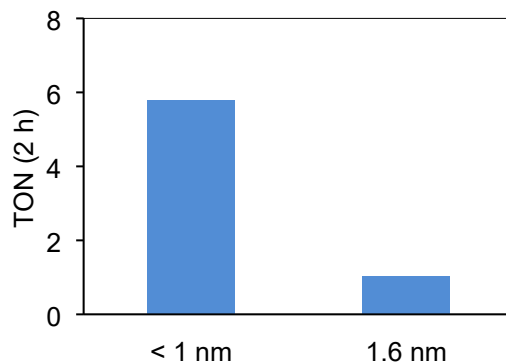

**Fig. S14** Representative STEM images and Au particle size histogram (based on 100 particle counts) of Au/PyEt-MSN with a 3.9 wt. % metal loading.

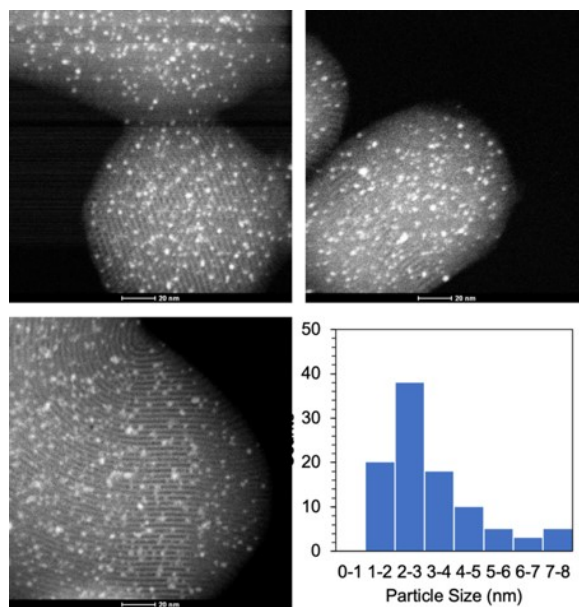

**Fig. S15** Comparison between the catalytic activities of Au/PyEt-MSN with different particle sizes. The different particle sizes were obtained using different Au wt %. 0.5 wt % of Au gave particles of ca. 2.1 nm, and 3.9 wt % of Au gave particles averaging 3.2 nm.

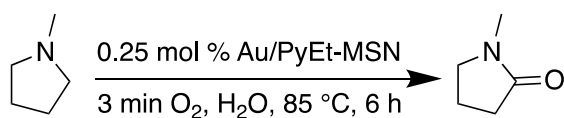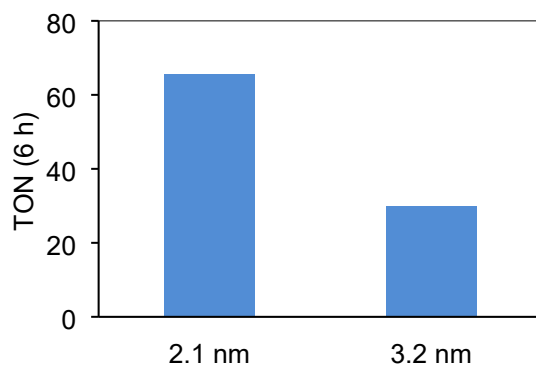

**Fig. S16** Variation in catalyst properties as a function of PyEt group loading. a) Catalytic activity for the oxidation of N-methylpyrrolidine to N-methylpyrrolidone using Au/PyEt-MSN with 0.65, 0.94 and 1.4 mmol PyEt groups per g of material (conditions: 0.25 mol % Au, 2 mL H<sub>2</sub>O, 100 °C, 6 h, 3 min O<sub>2</sub> overhead flow). b) STEM images of Au/PyEt-MSN with 0.65 mmol PyEt/g and the corresponding particle size histogram. c) STEM images of Au/PyEt-MSN with 1.4 mmol PyEt/g and the corresponding particle size histogram.

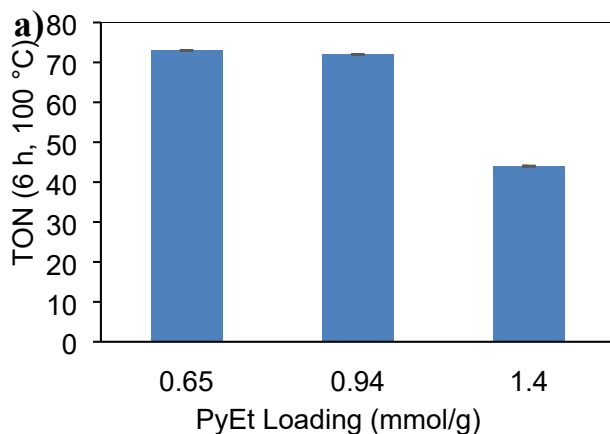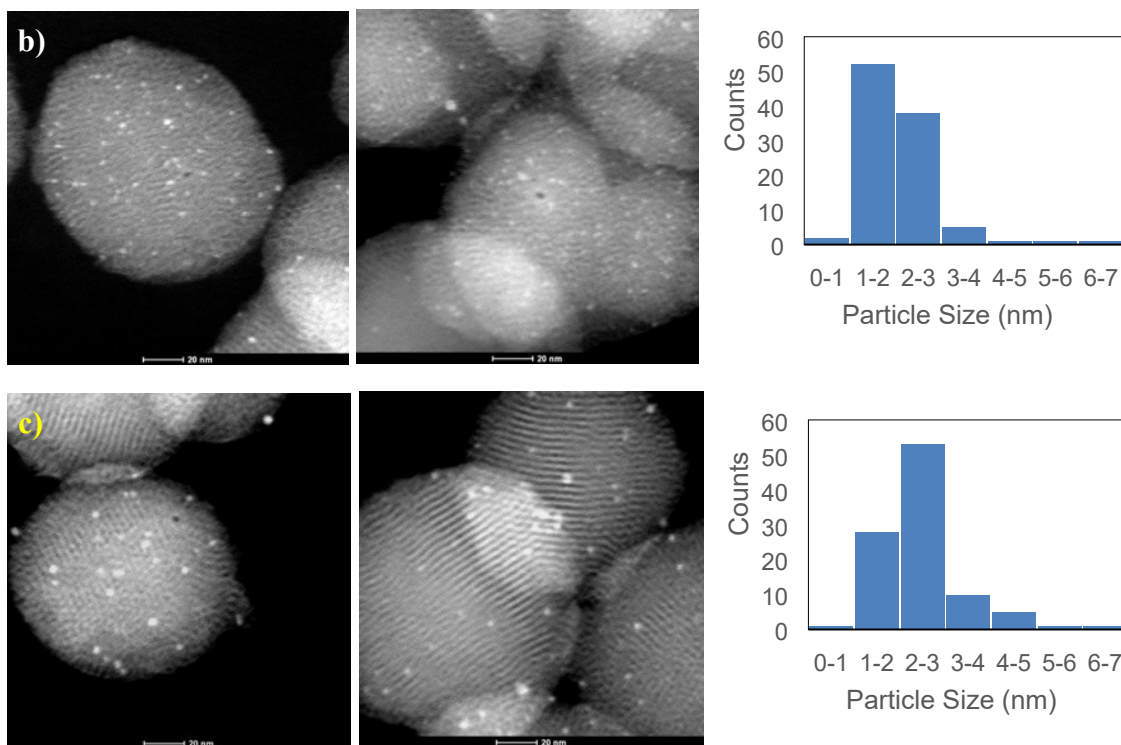

**Fig. S17** Deconvolution of N 1s XPS of Au/PyEt-MSN shows ca. 41% N coordinated with Au (400 eV, red line), 42% pyridinic N (398.9 eV, green line), 11% protonated N (401.9 eV, light blue line) and 6 % pyridine N-oxide (402.9 eV, orange line).

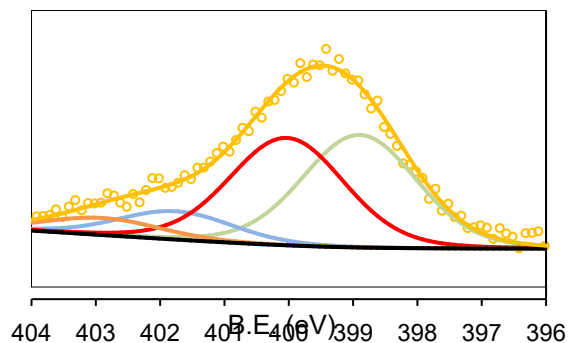

**Fig. S18** EPR spectra of a) Au/PyEt-MSN in air, b) DMPO-Toluene mixture in air, and c) Au/PyEt-MSN with DMPO-Toluene under N<sub>2</sub>, d) Au/MP-MSN with DMPO in air, and e) Au/PyEt-MSN with DMPO in air. All

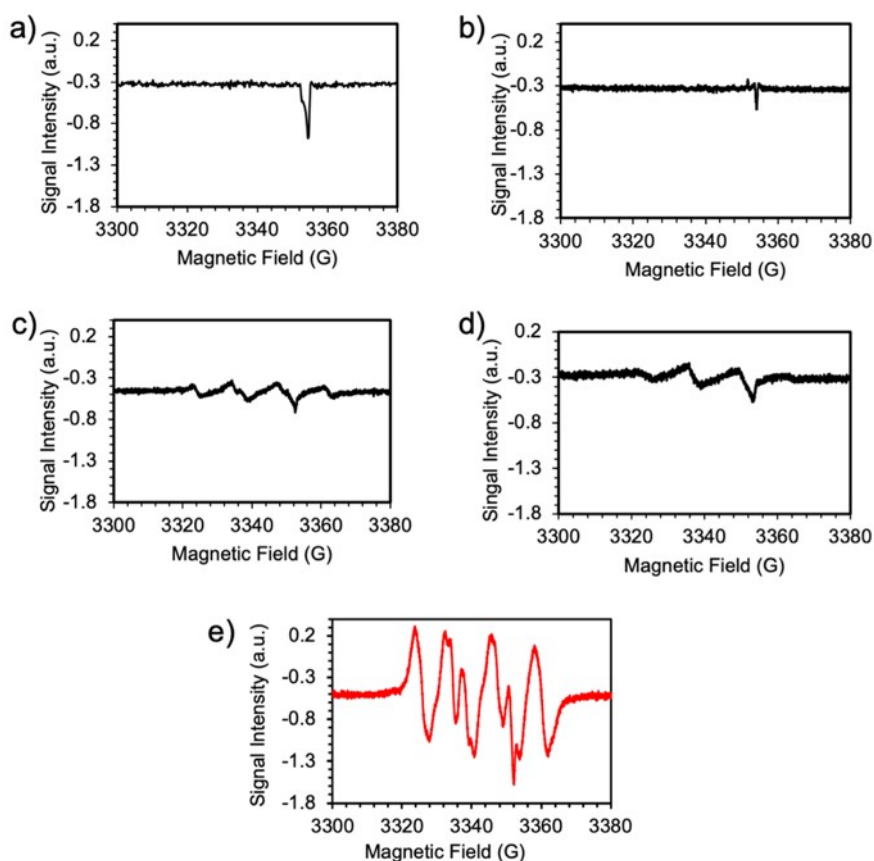

samples contain the same amount of DMPO (0.62 mmol), and the same amount of catalyst (ca. 20 mg, except sample b that has no catalyst).

**Fig. S19** Recycling of Au/PyEt-MSN.

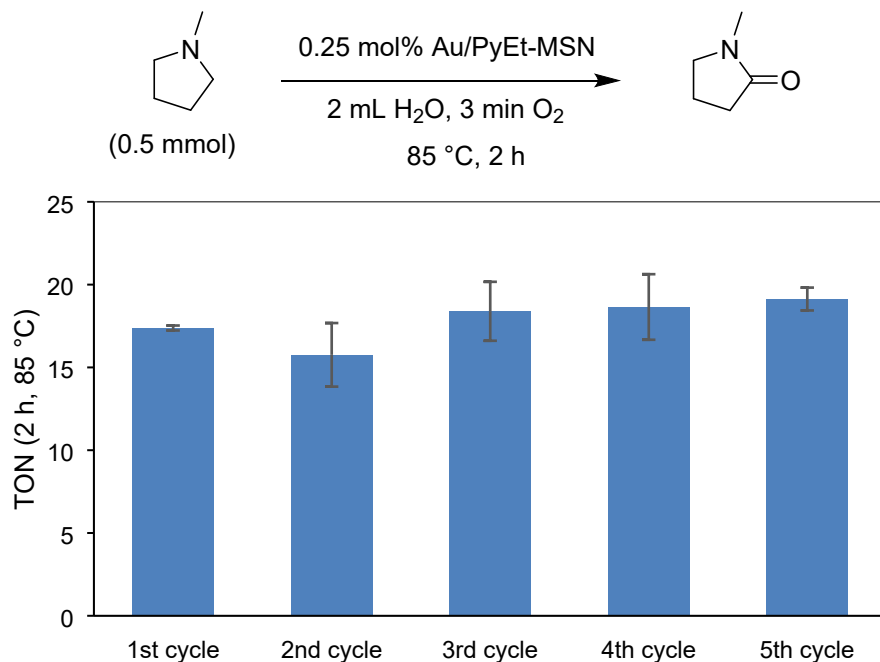

**Fig. S20** XP spectrum of the spent Au/PyEt-MSN catalyst (bottom) compared to that of the fresh catalyst. A small shift of the Au 4f<sub>7/2</sub> peak to higher binding energy is observed. However, the spent catalyst still has a lower binding energy than bulk Au (discontinuous line at 83.9 eV) indicating that it remains electron rich.

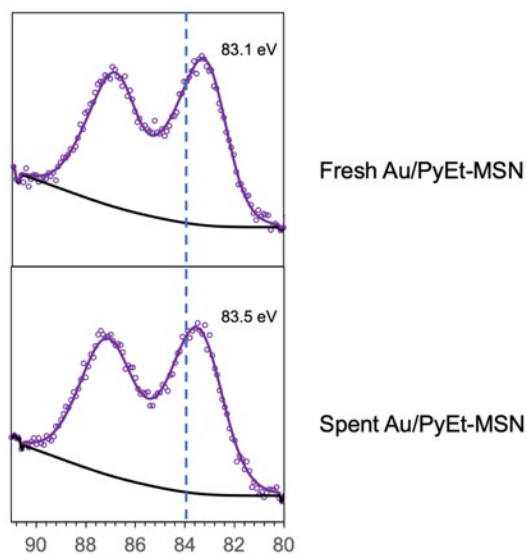

**Fig. S21** Amines with different functional groups investigated as substrates for the Au/PyEt-MSN catalyzed aerobic oxidation. None of these substrates was converted to the corresponding amides under the standard reaction conditions (0.25 mol % catalyst, 2 mL H<sub>2</sub>O, 100 °C, 6 h, 3 min O<sub>2</sub> overhead flow).

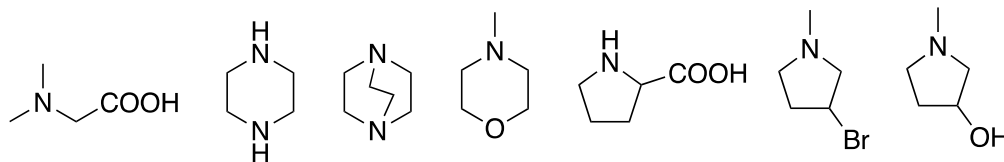

### Characterization of Products.

**Product 1.** 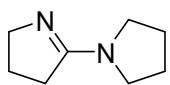 <sup>1</sup>H-NMR (400 MHz, CDCl<sub>3</sub>): δ = 3.61 (t, J = 7.0 Hz, 2H), 3.34 (t, 4H), 2.46 (t, J = 8.1 Hz, 2H), 1.92 (dt, J = 16.0, 7.6 Hz, 2H), 1.84 (t, 6.7 Hz, 4H). MS (EI): m/z = 138 [M<sup>+</sup>].

**Product of reaction of 2.** 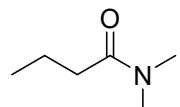 <sup>1</sup>H-NMR (600 MHz, D<sub>2</sub>O): δ = 3.16 (s, 6H), 2.15 (t, J = 7.4 Hz, 2H), 1.76 (m, 2H), 0.94 (t, J = 7.4 Hz, 3H). MS (ESI): m/z = 118.1 [MH<sup>+</sup>].

**Product of reaction 5.** 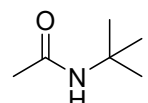 <sup>1</sup>H-NMR (600 MHz, D<sub>2</sub>O): δ = 1.91 (s, 3H), 1.31 (s, 9H). MS (ESI): m/z = 118 [MH<sup>+</sup>].

**Product of reaction 6.** 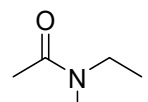 <sup>1</sup>H-NMR (600 MHz, D<sub>2</sub>O): δ = 3.05 (s, 3H), 2.85 (q, J = 7.2 Hz, 2H), 1.91 (s, 3H), 1.18 (t, J = 7.2 Hz, 3H). MS (EI): m/z = 101 [M<sup>+</sup>].



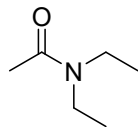

**Product of reaction 7.**  $^1\text{H-NMR}$  (600 MHz,  $\text{D}_2\text{O}$ ):  $\delta = 3.31$  (q,  $J = 7.3$  Hz, 4H), 1.95 (s, 3H), 1.29 (t,  $J = 7.2$  Hz, 6 H). MS (ESI):  $m/z = 118.1$  [ $\text{MH}^+$ ].

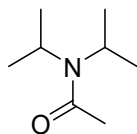

**Product of reaction 8.**  $^1\text{H-NMR}$  (600 MHz,  $\text{D}_2\text{O}$ ):  $\delta = 3.46$  (p,  $J = 6.5$  Hz, 1H), 2.95 (q,  $J = 7.4$  Hz, 1H), 2.22 (s, 3H), 1.22 (d,  $J = 6.5$  Hz, 8H), 1.13 (t,  $J = 5.8$  Hz, 4H). MS (ESI):  $m/z = 145.9$  [ $\text{MH}^+$ ].

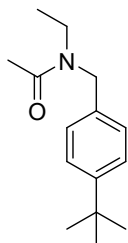

**Product of reaction 11.**  $^1\text{H-NMR}$  (600 MHz,  $\text{D}_2\text{O}$ ):  $\delta = 7.44$ -7.50 (m, 4H), 4.51 (s, 2H), 3.11 (q,  $J = 7.4$  Hz, 2H), 2.22 (m, 2H), 1.28-1.33 (m, 12H). MS (ESI):  $m/z = 235.2$  [ $\text{MH}^+$ ].

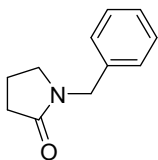

**Product of reaction 12.**  $^1\text{H-NMR}$  (600 MHz,  $\text{D}_2\text{O}$ ):  $\delta = 7.31$ -7.58 (m, 5H), 4.51 (s, 2H), 4.00 (s, 2H), 3.42 (t, 2H), 2.51 (t, 2H), 2.04 (q, 2H). MS (ESI):  $m/z = 176.1$  [ $\text{MH}^+$ ].

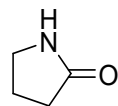

**Product of reaction 13.**  $^1\text{H-NMR}$  (600 MHz,  $\text{D}_2\text{O}$ ):  $\delta = 3.42$  (t,  $J = 7.1$  Hz, 2H), 2.35 (t,  $J = 8.1$  Hz, 2H), 2.13 (qd, 8.1, 6.8 Hz, 2H). MS (EI):  $m/z = 85$  [ $\text{M}^+$ ].

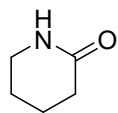

**Product of reaction 14.**  $^1\text{H-NMR}$  (600 MHz,  $\text{D}_2\text{O}$ ):  $\delta = 3.20$  (t,  $J = 5.7$  Hz, 2H), 2.24 (t,  $J = 6.3$  Hz, 2H), 1.51-1.63 (m, 4H). MS (EI):  $m/z = 99$  [ $\text{M}^+$ ].

**Product of reaction 15.** 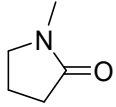  $^1\text{H-NMR}$  (600 MHz,  $\text{D}_2\text{O}$ ):  $\delta = 3.49$  (t, 2H), 2.81 (s, 3H), 2.41 (t,  $J = 8.1$  Hz, 2H), 2.03 (qd,  $J = 8.1, 6.9$  Hz, 2H). MS (ESI):  $m/z = 100.1$  [ $\text{MH}^+$ ].

**Product of reaction 16.** 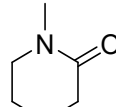  $^1\text{H-NMR}$  (400 MHz,  $\text{CDCl}_3$ ):  $\delta = 3.30$  (t, 2H), 2.96 (s, 3H), 2.39 (t,  $J = 6.1$  Hz, 2H), 1.82 (m, 4H). MS (EI):  $m/z = 113$  [ $\text{M}^+$ ].

**Product 17.** 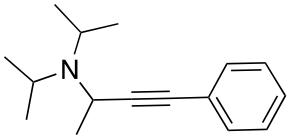  $^1\text{H-NMR}$  (600 MHz,  $\text{CDCl}_3$ ):  $\delta = 7.26$ -7.36 (m, 2H), 7.18-7.22 (m, 3H), 4.08 (q, 1H), 3.25-3.33 (m, 2H), 1.05-1.33 (m, 15H).  $^{13}\text{C-NMR}$  (400 MHz,  $\text{CDCl}_3$ )  $\delta = 20.45, 24.17, 26.66, 125.1, 127.68, 128.31, 131.57$ . MS (ESI):  $m/z = 230.2$  [ $\text{MH}^+$ ].

**Product 18.** 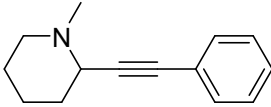  $^1\text{H-NMR}$  (600 MHz,  $\text{CDCl}_3$ ):  $\delta = 7.25$ -7.43 (m, 5H), 3.52 (t, 1H), 2.60 (t, 1H), 2.36 (s, 3H), 2.34 (t, 1H), 1.86 (t, 1H), 1.79 (t, 1H), 1.64 (t, 1H), 1.57 (m, 2H), 1.43 (t, 1H).  $^{13}\text{C-NMR}$  (400 MHz,  $\text{CDCl}_3$ ):  $\delta = 20.84, 25.72, 31.80, 44.43, 52.02, 54.81, 77.15, 86.35, 87.33, 123.4, 127.7, 128.2, 131.8$ . MS (EI):  $m/z = 199$  [ $\text{M}^+$ ].

**Product 19.** 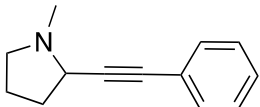  $^1\text{H-NMR}$  (600 MHz,  $\text{CDCl}_3$ ):  $\delta = 7.26$ -7.50 (m, 5H), 3.36 (t,  $J = 7.1$  Hz, 1H), 2.94 (dt,  $J = 8.8$  Hz and 3.9 Hz, 1H), 2.50 (s, 3H), 2.45 (q,  $J = 8.8$  Hz, 1H), 2.18-2.23 (m, 1 H), 1.96-2.06 (m, 1 H), 1.79-1.83 (m, 1H).  $^{13}\text{C-NMR}$  (400 MHz,  $\text{CDCl}_3$ ):  $\delta = 22.42, 32.26, 39.69, 54.70, 57.11, 83.67, 88.8, 123.1, 128.1, 128.3, 131.7$ . MS (EI):  $m/z = 185$  [ $\text{M}^+$ ].

**Product 20.** 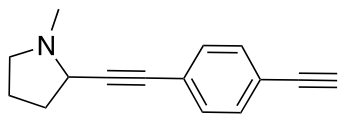  $^1\text{H-NMR}$  (600 MHz,  $\text{CDCl}_3$ ):  $\delta$  = 7.46 (s, 4H), 3.38 (t, 1H), 3.18 (s, 1H), 2.31-2.26 (m, 2H), 2.18 (s, 3H), 2.09-1.94 (m, 4H).  $^{13}\text{C-NMR}$  (400 MHz,  $\text{CDCl}_3$ ):  $\delta$  = 22.56, 30.94, 40.88, 54.88, 57.18, 77.97, 79.91, 82.40, 89.36, 122.7, 131.8. MS (ESI):  $m/z$  = 210 [ $\text{MH}^+$ ].

**Product 21.** 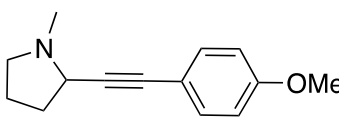  $^1\text{H-NMR}$  (600 MHz,  $\text{CDCl}_3$ ):  $\delta$  = 7.44 (d, 2H), 6.84 (d, 2H), 3.92 (s, 3H), 3.47 (t, 1H), 2.72 (t, 1H), 2.56 (t, 1H), 2.35 (m, 1H), 2.22 (m, 1H), 2.12 (m, 1H), 1.96 (m, 1H).  $^{13}\text{C-NMR}$  (400 MHz,  $\text{CDCl}_3$ ):  $\delta$  = 22.46, 33.66, 39.91, 54.56, 54.87, 57.18, 84.67, 87.17, 114.2, 115.4, 133.3, 160.3. MS (EI):  $m/z$  = 214 [ $\text{M}^+$ ].
